# Supplementary material for: Trends and Disparities in Mortality Due to Non-Insulin Dependent Diabetes Mellitus and Acute Myocardial Infarction: A 23-Year Analysis from 1999 to 2022
Source: Research Square preprint supplement (doi:10.21203/rs.3.rs-6480876/v1), 2025-09-01
Supplement: Supplementary file 1 [file 12af5218c335f2e32255a2f8.docx]

**Supplementary Tables**

**Supplemental Table 1**: Overall and gender stratified comorbid Diabetes mellitus and Acute Myocardial Infarction–related mortality, among 55-85+ years old individuals in the United States from 1999 to 2022

| Deaths | | | |
| --- | --- | --- | --- |
| Year | **Men** | **Women** | **Overall** |
| 1999 | 2837 | 2725 | 5562 |
| 2000 | 2979 | 2981 | 5960 |
| 2001 | 3044 | 2980 | 6024 |
| 2002 | 3288 | 3139 | 6427 |
| 2003 | 3386 | 3097 | 6483 |
| 2004 | 3403 | 3037 | 6440 |
| 2005 | 3502 | 3243 | 6745 |
| 2006 | 3491 | 3095 | 6586 |
| 2007 | 3414 | 3096 | 6510 |
| 2008 | 3607 | 3076 | 6683 |
| 2009 | 3593 | 3054 | 6647 |
| 2010 | 3645 | 2925 | 6570 |
| 2011 | 3606 | 2828 | 6434 |
| 2012 | 3612 | 2913 | 6525 |
| 2013 | 3957 | 2812 | 6769 |
| 2014 | 3950 | 2857 | 6807 |
| 2015 | 4324 | 3046 | 7370 |
| 2016 | 4963 | 3391 | 8354 |
| 2017 | 5321 | 3684 | 9005 |
| 2018 | 5746 | 3601 | 9347 |
| 2019 | 5757 | 3792 | 9549 |
| 2020 | 7242 | 4726 | 11968 |
| 2021 | 7579 | 4802 | 12381 |
| 2022 | 7412 | 4663 | 12075 |
| Total | **103658** | **79563** | **183221** |

**Supplemental Table 2:** Comorbid Diabetes mellitus and Acute Myocardial Infarction –related mortality deaths, stratified by Race among 55-85+ years old individuals in United States,1999 to 2020

| Deaths | | | | | | |
| --- | --- | --- | --- | --- | --- | --- |
| Year | **NH White** | **NH Black or African American** | **NH Asian or Pacific Islander** | **NH American Indian or Alaska Native** | **Hispanic or Latino** | **Population** |
| 1999 | 4590 | 536 | 85 | 48 | 297 | 58575867 |
| 2000 | 4858 | 598 | 98 | 43 | 345 | 59266437 |
| 2001 | 4889 | 638 | 82 | 38 | 363 | 60395586 |
| 2002 | 5213 | 631 | 118 | 50 | 398 | 62225539 |
| 2003 | 5182 | 699 | 117 | 61 | 410 | 63872474 |
| 2004 | 5195 | 669 | 108 | 47 | 412 | 65508623 |
| 2005 | 5305 | 733 | 149 | 58 | 487 | 67291295 |
| 2006 | 5091 | 785 | 136 | 61 | 504 | 69094220 |
| 2007 | 5087 | 695 | 151 | 53 | 513 | 70954145 |
| 2008 | 5260 | 683 | 168 | 47 | 512 | 72934684 |
| 2009 | 5044 | 751 | 190 | 61 | 593 | 75028775 |
| 2010 | 4980 | 716 | 184 | 50 | 628 | 76750713 |
| 2011 | 4902 | 724 | 184 | 63 | 549 | 79456281 |
| 2012 | 4888 | 736 | 204 | 74 | 612 | 81731558 |
| 2013 | 4989 | 752 | 259 | 58 | 702 | 84020505 |
| 2014 | 5013 | 738 | 253 | 62 | 723 | 86320792 |
| 2015 | 5294 | 804 | 349 | 85 | 819 | 88638671 |
| 2016 | 5971 | 978 | 354 | 85 | 943 | 90707339 |
| 2017 | 6384 | 979 | 453 | 82 | 1087 | 92854337 |
| 2018 | 6576 | 1039 | 495 | 87 | 1133 | 94703829 |
| 2019 | 6663 | 1064 | 509 | 95 | 1199 | 96506800 |
| 2020 | 8056 | 1363 | 663 | 104 | 1766 | 98063042 |
| Total | **119430** | **17311** | **5309** | **1412** | **14995** | **1694901512** |

NH=Non Hispanics

**Supplemental Table 3:** Comorbid Diabetes mellitus and Acute Myocardial Infarction –relateddeaths per 1000,000 Stratified by Age groups in Adults among 55-85+ years old individuals in the United States from 1999 to 2020

| **Deaths** | | | | |
| --- | --- | --- | --- | --- |
| **Years** | **55-64 years** | **65-74 years** | **75-84 years** | **85+ years** |
| 1999 | 775 | 1483 | 2135 | 1169 |
| 2000 | 812 | 1614 | 2210 | 1324 |
| 2001 | 803 | 1630 | 2240 | 1351 |
| 2002 | 943 | 1681 | 2386 | 1417 |
| 2003 | 994 | 1718 | 2368 | 1403 |
| 2004 | 1014 | 1665 | 2273 | 1488 |
| 2005 | 1103 | 1770 | 2331 | 1541 |
| 2006 | 1131 | 1652 | 2344 | 1459 |
| 2007 | 1082 | 1611 | 2208 | 1609 |
| 2008 | 1189 | 1725 | 2197 | 1572 |
| 2009 | 1184 | 1751 | 2169 | 1543 |
| 2010 | 1179 | 1707 | 2129 | 1555 |
| 2011 | 1192 | 1697 | 2058 | 1487 |
| 2012 | 1194 | 1778 | 1954 | 1599 |
| 2013 | 1206 | 1934 | 2052 | 1577 |
| 2014 | 1304 | 1956 | 2021 | 1526 |
| 2015 | 1397 | 2230 | 2084 | 1659 |
| 2016 | 1577 | 2505 | 2452 | 1820 |
| 2017 | 1664 | 2691 | 2753 | 1897 |
| 2018 | 1747 | 2972 | 2709 | 1919 |
| 2019 | 1769 | 2913 | 2955 | 1912 |
| 2020 | 2188 | 3762 | 3623 | 2395 |
| **Total** | **27447** | **44445** | **51651** | **35222** |

**Supplemental Table 4:** Overall and Sex‐Stratified of Comorbid Diabetes mellitus and Acute Myocardial Infarction –related Age-Adjusted Mortality Rates per 1000,000 among 55-85+ years old individuals in the United States from 1999 to 2020

| Age-Adjusted Mortality Rate (95% CI) | | | |
| --- | --- | --- | --- |
| Year | **Men** | **Women** | **Overall** |
| 1999 | 122.3 (117.8 - 126.9) | 77.2 (74.3 - 80.1) | 95.3 (92.8 - 97.8) |
| 2000 | 126.5 (121.9 - 131.1) | 83.4 (80.4 - 86.4) | 101.0 (98.5 - 103.6) |
| 2001 | 126.5 (121.9 - 131.0) | 82.2 (79.3 - 85.2) | 100.6 (98.0 - 103.1) |
| 2002 | 133.4 (128.7 - 138.0) | 85.8 (82.8 - 88.8) | 105.4 (102.9 - 108.0) |
| 2003 | 134.0 (129.4 - 138.6) | 83.7 (80.7 - 86.7) | 104.6 (102.0 - 107.1) |
| 2004 | 133.0 (128.4 - 137.5) | 81.1 (78.2 - 84.0) | 102.2 (99.7 - 104.7) |
| 2005 | 132.5 (128.0 - 136.9) | 85.0 (82.1 - 88.0) | 104.9 (102.4 - 107.4) |
| 2006 | 128.0 (123.7 - 132.4) | 79.9 (77.0 - 82.7) | 100.4 (97.9 - 102.8) |
| 2007 | 122.8 (118.6 - 127.0) | 78.1 (75.3 - 80.8) | 97.2 (94.9 - 99.6) |
| 2008 | 125.6 (121.4 - 129.7) | 76.6 (73.9 - 79.4) | 97.4 (95.1 - 99.8) |
| 2009 | 122.0 (117.9 - 126.1) | 74.7 (72.0 - 77.4) | 95.0 (92.7 - 97.3) |
| 2010 | 121.4 (117.4 - 125.4) | 70.4 (67.8 - 73.0) | 92.3 (90.0 - 94.5) |
| 2011 | 115.5 (111.6 - 119.3) | 66.5 (64.0 - 68.9) | 87.7 (85.6 - 89.9) |
| 2012 | 111.9 (108.2 - 115.6) | 66.5 (64.0 - 68.9) | 86.1 (84.0 - 88.2) |
| 2013 | 118.5 (114.7 - 122.3) | 63.4 (61.0 - 65.8) | 87.2 (85.1 - 89.3) |
| 2014 | 113.9 (110.3 - 117.6) | 62.9 (60.6 - 65.3) | 85.2 (83.1 - 87.2) |
| 2015 | 121.5 (117.8 - 125.2) | 64.9 (62.5 - 67.2) | 89.6 (87.5 - 91.6) |
| 2016 | 135.4 (131.5 - 139.2) | 71.1 (68.7 - 73.5) | 99.4 (97.3 - 101.6) |
| 2017 | 141.7 (137.8 - 145.6) | 76.0 (73.5 - 78.5) | 104.8 (102.6 - 107.0) |
| 2018 | 146.9 (143.0 - 150.8) | 72.1 (69.7 - 74.5) | 105.2 (103.1 - 107.4) |
| 2019 | 144.3 (140.5 - 148.1) | 74.6 (72.2 - 77.0) | 105.5 (103.3 - 107.6) |
| 2020 | 176.9 (172.7 - 181.0) | 91.0 (88.4 - 93.6) | 129.1 (126.8 - 131.5) |
| 2021 | 186.4 (182.1 - 190.7) | 95.1 (92.4 - 97.8) | 135.7 (133.2 - 138.1) |
| 2022 | 177.4 (173.3 - 181.5) | 87.9 (85.4 - 90.4) | 127.3 (125.0 - 129.6) |

**Supplemental Table 5:** Comorbid Diabetes mellitus and Acute Myocardial Infarction –relatedAge-Adjusted Mortality Rates per 1000,000, Stratified by Race among 55-85+ years old individuals in the United States from 1999 to 2020

| Age-Adjusted Mortality Rate (95% CI) | | | | | |
| --- | --- | --- | --- | --- | --- |
| Year | **NH White** | **NH Black or African American** | **NH American Indian or Alaska Native** | **Hispanic or Latino** | **NH Asian or Pacific Islander** |
| 1999 | 92.9 (90.2 - 95.5) | 111.3 (101.8 - 120.8) | 208.3 (151.4 - 279.7) | 111.8 (98.7 - 124.9) | 68.6 (54.2 - 85.6) |
| 2000 | 97.6 (94.8 - 100.3) | 123.5 (113.5 - 133.5) | 183.2 (131.5 - 248.6) | 121.3 (108.1 - 134.5) | 72.0 (58.1 - 88.3) |
| 2001 | 97.2 (94.5 - 100.0) | 130.6 (120.4 - 140.9) | 159.8 (111.9 - 221.3) | 121.2 (108.3 - 134.1) | 56.8 (44.8 - 71.1) |
| 2002 | 102.4 (99.6 - 105.1) | 126.0 (116.1 - 135.9 | 193.7 (141.8 - 258.4) | 122.2 (109.8 - 134.6) | 81.1 (66.1 - 96.1) |
| 2003 | 100.4 (97.7 - 103.2) | 135.9 (125.7 - 146.1) | 239.1 (180.6 - 310.5) | 123.5 (111.2 - 135.9) | 69.9 (56.8 - 82.9) |
| 2004 | 99.4 (96.7 - 102.2) | 129.2 (119.2 - 139.1) | 165.9 (120.1 - 223.5) | 115.2 (103.8 - 126.7) | 60.0 (48.3 - 71.6) |
| 2005 | 100.1 (97.4 - 102.8) | 135.5 (125.6 - 145.5) | 192.0 (142.9 - 252.4) | 129.3 (117.5 - 141.2) | 78.4 (65.4 - 91.3) |
| 2006 | 94.6 (92.0 - 97.2) | 143.2 (133.0 - 153.4) | 193.1 (145.0 - 251.9) | 130.6 (118.9 - 142.4) | 70.1 (58.1 - 82.2) |
| 2007 | 92.9 (90.3 - 95.5) | 124.6 (115.2 - 134.1) | 164.6 (120.9 - 218.8) | 126.4 (115.2 - 137.6) | 73.0 (61.0 - 84.9) |
| 2008 | 94.4 (91.8 - 97.0) | 117.3 (108.3 - 126.3) | 137.1 (98.4 - 186.0) | 119.6 (109.0 - 130.3) | 76.6 (64.7 - 88.5) |
| 2009 | 89.1 (86.6 - 91.6) | 125.6 (116.4 - 134.8) | 185.9 (140.0 - 241.9) | 128.8 (118.1 - 139.4) | 78.4 (67.0 - 89.9) |
| 2010 | 86.8 (84.4 - 89.2) | 117.1 (108.3 - 125.9) | 133.5 (97.0 - 179.2) | 132.5 (121.9 - 143.2) | 75.9 (64.7 - 87.2) |
| 2011 | 83.5 (81.1 - 85.8) | 113.4 (104.9 - 121.9) | 156.8 (118.1 - 204.1) | 108.1 (98.8 - 117.4) | 69.5 (59.2 - 79.7) |
| 2012 | 81.2 (78.9 - 83.5) | 109.6 (101.4 - 117.7) | 190.8 (147.2 - 243.2) | 113.4 (104.2 - 122.6) | 71.9 (61.8 - 82.0) |
| 2013 | 81.4 (79.1 - 83.7) | 109.0 (101.0 - 117.1) | 138.6 (103.5 - 181.8) | 121.1 (111.9 - 130.3) | 83.2 (72.8 - 93.6) |
| 2014 | 80.0 (77.8 - 82.3) | 101.2 (93.7 - 108.7) | 134.7 (101.8 - 174.9) | 118.5 (109.6 - 127.4) | 78.4 (68.6 - 88.3) |
| 2015 | 82.8 (80.6 - 85.1) | 106.1 (98.5 - 113.7) | 180.5 (142.2 - 225.9) | 123.3 (114.6 - 132.0) | 97.9 (87.5 - 108.4) |
| 2016 | 92.0 (89.6 - 94.4) | 125.1 (117.0 - 133.2) | 171.6 (135.4 - 214.5) | 134.8 (126.0 - 143.7) | 96.8 (86.6 - 107.1) |
| 2017 | 96.7 (94.3 - 99.1) | 121.2 (113.3 - 129.0) | 161.5 (127.1 - 202.5) | 150.6 (141.4 - 159.8) | 116.3 (105.4 - 127.2) |
| 2018 | 97.0 (94.6 - 99.4) | 122.3 (114.7 - 130.0) | 154.0 (122.3 - 191.4) | 145.6 (136.9 - 154.4) | 120.3 (109.6 - 131.1) |
| 2019 | 96.9 (94.6 - 99.3) | 122.2 (114.6 - 129.7) | 170.5 (136.7 - 210.1) | 149.2 (140.5 - 157.9) | 118.0 (107.6 - 128.4) |
| 2020 | 115.2 (112.7 - 117.7) | 151.4 (143.2 - 159.7) | 171.6 (137.4 - 205.7) | 211.6 (201.4 - 221.7) | 145.6 (134.4 - 156.8) |

**Supplemental Table 6:** Comorbid Diabetes mellitus and Acute Myocardial Infarction-related Crude Mortality Rates per 1000,000 Stratified by Age groups among 55-85+ years old individuals in the United States from 1999 to 2020

| **Crude Mortality Rate (95% CI)** | | | | |
| --- | --- | --- | --- | --- |
| **Years** | **55-64 years** | **65-74 years** | **75-84 years** | **85+ years** |
| 1999 | 32.6 (30.3 - 34.9) | 80.5 (76.4 - 84.6) | 174.6 (167.2 - 182.1) | 281.4 (265.3 - 297.5) |
| 2000 | 33.5 (31.1 - 35.8) | 87.8 (83.5 - 92.0) | 178.8 (171.3 - 186.2) | 312.3 (295.5 - 329.1) |
| 2001 | 32.0 (29.8 - 34.2) | 88.7 (84.4 - 93.0) | 177.9 (170.5 - 185.2) | 313.3 (296.6 - 330.0) |
| 2002 | 35.3 (33.1 - 37.6) | 91.4 (87.0 - 95.8) | 186.9 (179.4 - 194.4) | 324.3 (307.5 - 341.2) |
| 2003 | 35.5 (33.3 - 37.7) | 92.9 (88.5 - 97.3) | 183.6 (176.2 - 191.0) | 314.1 (297.7 - 330.6) |
| 2004 | 34.6 (32.5 - 36.7) | 89.2 (84.9 - 93.5) | 175.0  (167.8 - 182.2) | 327.3 (310.7 - 344.0) |
| 2005 | 36.0 (33.9 - 38.1) | 93.7 (89.4 - 98.1) | 178.3  (171.0 - 185.5) | 328.3 (311.9 - 344.7) |
| 2006 | 35.4 (33.4 - 37.5) | 86.0 (81.9 - 90.2) | 179.0 (171.8 - 186.2) | 299.8 (284.5 - 315.2) |
| 2007 | 32.7 (30.7 - 34.6) | 81.8 (77.8 - 85.8) | 168.7 (161.7 - 175.7) | 319.3 (303.7 - 334.9) |
| 2008 | 34.8 (32.8 - 36.8) | 84.1 (80.2 - 88.1) | 168.0 (161.0 - 175.0) | 302.5 (287.6 - 317.5) |
| 2009 | 33.4 (31.5 - 35.3) | 82.5 (78.6 - 86.3) | 166.6 (159.5 - 173.6) | 287.5 (273.1 - 301.8) |
| 2010 | 32.3 (30.5 - 34.2) | 78.6 (74.9 - 82.3) | 163.0 (156.1 - 169.9) | 283.1 (269.0 - 297.1) |
| 2011 | 31.3 (29.5 - 33.1) | 75.5 (71.9 - 79.1) | 156.2 (149.5 - 163.0) | 259.2 (246.0 - 272.4) |
| 2012 | 30.9 (29.2 - 32.7) | 74.1 (70.7 - 77.6) | 147.2 (140.7 - 153.7) | 271.6 (258.3 - 284.9) |
| 2013 | 30.7 (28.9 - 32.4) | 76.7 (73.3 - 80.1) | 152.6 (146.0 - 159.2) | 261.1 (248.2 - 273.9) |
| 2014 | 32.5 (30.8 - 34.3) | 74.1 (70.8 - 77.4) | 147.7 (141.3 - 154.1) | 247.6 (235.2 - 260.1) |
| 2015 | 34.2 (32.4 - 36.0) | 80.9 (77.6 - 84.3) | 149.7 (143.3 - 156.1) | 263.9 (251.2 - 276.6) |
| 2016 | 38.0 (36.2 - 39.9) | 87.5 (84.1 - 90.9) | 172.3 (165.5 - 179.1) | 285.3 (272.1 - 298.4) |
| 2017 | 39.6 (37.7 - 41.5) | 90.7 (87.2 - 94.1) | 187.2 (180.2 - 194.2) | 293.3 (280.1 - 306.5) |
| 2018 | 41.3 (39.4 - 43.3) | 97.5 (94.0 - 101.0) | 176.0 (169.3 - 182.6) | 293.2 (280.1 - 306.3) |
| 2019 | 41.7 (39.7 - 43.6) | 92.5 (89.2 - 95.9) | 185.0 (178.4 - 191.7) | 289.5 (276.5 - 302.5) |
| 2020 | 51.6 (49.4 - 53.8) | 115.6 (111.9 - 119.3) | 220.2 (213.1 - 227.4) | 359.7 (345.3 - 374.1) |
| **Total** | **35.8 (35.4 - 36.2)** | **87.1 (86.3 - 87.9)** | **173.0 (171.5 - 174.5)** | **294.7 (291.6 - 297.8)** |

**Supplemental Table 7:** Comorbid Diabetes mellitus and Acute Myocardial Infarction-related Age-Adjusted Mortality Rates per 1000,000 Stratified by Census Region among 55-85+ years old individuals in the United States from 1999 to 2020

| **Age-Adjusted Mortality Rate (95% CI)** | | | | |
| --- | --- | --- | --- | --- |
| **Year** | **Northeast** | **Midwest** | **South** | **West** |
| **1999** | 90.0 (84.7 - 95.3) | 119.5 (113.8 - 125.2) | 91.9 (87.7 - 96.0) | 77.8 (72.7 - 82.9) |
| **2000** | 87.9 (82.7 - 93.1) | 125.1 (119.2 - 130.9) | 103.7 (99.3 - 108.1) | 80.7 (75.5 - 85.8) |
| **2001** | 86.0 (80.9 - 91.1) | 127.3 (121.4 - 133.2) | 102.1 (97.8 - 106.4) | 81.4 (76.3 - 86.6) |
| **2002** | 89.2 (84.0 - 94.4) | 128.2 (122.4 - 134.1) | 108.3 (103.9 - 112.7) | 90.8 (85.5 - 96.1) |
| **2003** | 88.2 (83.1 - 93.4) | 130.0 (124.1 - 135.9) | 107.7 (103.3 - 112.0) | 86.1 (81.0 - 91.3) |
| **2004** | 85.8 (80.8 - 90.9) | 123.3 (117.7 - 129.0) | 101.3 (97.1 - 105.5) | 96.1 (90.8 - 101.5) |
| **2005** | 81.8 (76.9 - 86.7) | 131.7 (125.9 - 137.6) | 104.2 (100.1 - 108.4) | 98.0 (92.6 - 103.3) |
| **2006** | 74.9 (70.3 - 79.6) | 121.4 (115.9 - 127.0) | 100.5 (96.5 - 104.6) | 101.5 (96.1 - 106.9) |
| **2007** | 72.2 (67.7 - 76.8) | 117.4 (112.0 - 122.8) | 92.8 (89.0 - 96.7) | 106.1 (100.7 - 111.6) |
| **2008** | 70.7 (66.3 - 75.2) | 119.6 (114.1 - 125.0) | 89.6 (85.8 - 93.3) | 112.0 (106.4 - 117.5) |
| **2009** | 63.5 (59.3 - 67.7) | 112.5 (107.3 - 117.7) | 93.3 (89.5 - 97.1) | 107.9 (102.6 - 113.2) |
| **2010** | 65.0 (60.7 - 69.2) | 102.3 (97.3 - 107.2) | 89.9 (86.2 - 93.6) | 111.0 (105.6 - 116.4) |
| **2011** | 59.0 (55.0 - 63.0) | 103.1 (98.2 - 108.1) | 84.9 (81.4 - 88.4) | 102.3 (97.3 - 107.4) |
| **2012** | 60.8 (56.8 - 64.8) | 97.0 (92.3 - 101.8) | 79.7 (76.3 - 83.0) | 108.4 (103.3 - 113.6) |
| **2013** | 57.4 (53.5 - 61.3) | 97.1 (92.4 - 101.8) | 78.0 (74.7 - 81.3) | 118.9 (113.7 - 124.2) |
| **2014** | 55.6 (51.8 - 59.4) | 91.2 (86.7 - 95.7) | 76.8 (73.6 - 80.0) | 118.5 (113.4 - 123.7) |
| **2015** | 55.4 (51.7 - 59.2) | 97.4 (92.8 - 102.0) | 78.9 (75.7 - 82.0) | 128.8 (123.5 - 134.1) |
| **2016** | 60.9 (57.0 - 64.8) | 108.7 (103.8 - 113.5) | 88.9 (85.5 - 92.2) | 140.8 (135.3 - 146.3) |
| **2017** | 57.6 (53.9 - 61.4) | 115.8 (110.8 - 120.7) | 92.8 (89.4 - 96.2) | 154.1 (148.5 - 159.8) |
| **2018** | 61.4 (57.6 - 65.2) | 116.5 (111.7 - 121.4) | 91.3 (88.0 - 94.6) | 154.3 (148.7 - 159.8) |
| **2019** | 60.3 (56.5 - 64.0) | 115.0 (110.2 - 119.8) | 94.4 (91.2 - 97.7) | 152.4 (147.0 - 157.9) |
| **2020** | 82.8 (78.5 - 87.2) | 135.8 (130.6 - 140.9) | 116.1 (112.5 - 119.7) | 182.8 (176.9 - 188.6) |
| **Total** | **70.4 (69.5 - 71.4)** | **115.0 (113.9 - 116.1)** | **93.5 (92.7 - 94.3)** | **118.8 (117.6 - 120.0)** |

**Supplemental Table 8:**  Comorbid Diabetes mellitus and Acute Myocardial Infarction-relatedAge-Adjusted Mortality Rates per 1000,000 Stratified by Urban-Rural Classification among 55-85+ years old individuals in the United States from 1999 to 2020

| **Age-Adjusted Mortality Rate (95% CI)** | | |
| --- | --- | --- |
|
| **Year** | **Metropolitan** | **Nonmetropolitan** |
| **1999** | 85.9 (83.0 - 88.7) | 118.3 (113.2 - 123.5) |
|  |  |
| **2000** | 89.6 (86.7 - 92.5) | 128.9 (123.5 - 134.2) |
|  |  |
| **2001** | 88.6 (85.8 - 91.4) | 130.0 (124.7 - 135.4) |
|  |  |
| **2002** | 92.3 (89.5 - 95.2) | 138.2 (132.6 - 143.7) |
|  |  |
| **2003** | 91.7 (88.8 - 94.5) | 136.5 (131.1 - 142.0) |
|  |  |
| **2004** | 90.6 (87.8 - 93.3) | 131.5 (126.2 - 136.8) |
|  |  |
| **2005** | 94.1 (91.3 - 97.0) | 132.1 (126.8 - 137.3) |
|  |  |
| **2006** | 90.5 (87.8 - 93.3) | 125.4 (120.3 - 130.5) |
|  |  |
| **2007** | 87.3 (84.7 - 90.0) | 122.3 (117.3 - 127.2) |
|  |  |
| **2008** | 88.4 (85.8 - 91.0) | 120.5 (115.6 - 125.4) |
|  |  |
| **2009** | 84.8 (82.2 - 87.4) | 121.1 (116.2 - 126.0) |
|  |  |
| **2010** | 85.4 (82.8 - 88.0) | 110.0 (105.4 - 114.7) |
|  |  |
| **2011** | 79.1 (76.7 - 81.6) | 110.2 (105.6 - 114.8) |
|  |  |
| **2012** | 78.0 (75.6 - 80.3) | 107.8 (103.3 - 112.2) |
|  |  |
| **2013** | 81.1 (78.7 - 83.5) | 103.4 (99.1 - 107.8) |
|  |  |
| **2014** | 79.5 (77.2 - 81.8) | 100.5 (96.3 - 104.7) |
|  |  |
| **2015** | 84.4 (82.1 - 86.8) | 103.3 (99.0 - 107.5) |
|  |  |
| **2016** | 94.5 (92.1 - 97.0) | 112.8 (108.4 - 117.2) |
|  |  |
| **2017** | 99.5 (97.0 - 102.0) | 119.4 (114.9 - 123.9) |
|  |  |
| **2018** | 98.8 (96.3 - 101.2) | 123.1 (118.7 - 127.6) |
|  |  |
| **2019** | 98.7 (96.3 - 101.1) | 124.4 (119.9 - 128.8) |
|  |  |
| **2020** | 121.6 (118.9 - 124.2) | 150.7 (145.8 - 155.6) |
|  |  |

95% CI= 95% Confidence Interval

**Supplemental Table 9:**  Comorbid Diabetes mellitus and Acute Myocardial Infarction –related Age Adjusted Mortality Rates per 1000,000 Stratified by States among 55-85+ years old individuals in the United States from 1999 to 2020

| **Deaths** |  |
| --- | --- |
| **State** | **Age-Adjusted Mortality Rate (95% CI)** |
| **Alabama** | 60.4 (57.4 - 63.5) |
| **Alaska** | 73.1 (60.9 - 85.4) |
| **Arizona** | 69.6 (66.8 - 72.4) |
| **Arkansas** | 99.0 (94.2 - 103.9) |
| **California** | 148.7 (146.9 - 150.6) |
| **Colorado** | 74.8 (71.1 - 78.4) |
| **Connecticut** | 39.1 (36.4 - 41.8) |
| **Delaware** | 92.4 (84.0 - 100.9) |
| **District of Columbia** | 70.7 (60.9 - 80.6) |
| **Florida** | 72.3 (70.8 - 73.7) |
| **Georgia** | 45.2 (43.1 - 47.3) |
| **Hawaii** | 72.6 (66.6 - 78.6) |
| **Idaho** | 114.9 (107.2 - 122.5) |
| **Illinois** | 90.1 (87.8 - 92.5) |
| **Indiana** | 124.1 (120.3 - 127.9) |
| **Iowa** | 142.2 (136.7 - 147.7) |
| **Kansas** | 97.5 (92.6 - 102.5) |
| **Kentucky** | 130.9 (126.2 - 135.7) |
| **Louisiana** | 41.7 (39.0 - 44.4) |
| **Maine** | 105.2 (98.2 - 112.2) |
| **Maryland** | 88.6 (85.1 - 92.1) |
| **Massachusetts** | 39.6 (37.6 - 41.7) |
| **Michigan** | 90.7 (88.1 - 93.2) |
| **Minnesota** | 82.6 (79.2 - 86.0) |
| **Mississippi** | 62.9 (58.8 - 66.9) |
| **Missouri** | 112.2 (108.6 - 115.8) |
| **Montana** | 65.1 (58.5 - 71.8) |
| **Nebraska** | 76.3 (70.8 - 81.7) |
| **Nevada** | 30.1 (27.0 - 33.3) |
| **New Hampshire** | 79.3 (72.7 - 85.9) |
| **New Jersey** | 69.8 (67.5 - 72.2) |
| **New Mexico** | 90.6 (84.8 - 96.4) |
| **New York** | 54.5 (53.1 - 55.9) |
| **North Carolina** | 113.7 (110.6 - 116.7) |
| **North Dakota** | 124.9 (113.8 - 135.9) |
| **Ohio** | 171.8 (168.6 - 175.0) |
| **Oklahoma** | 116.8 (112.0 - 121.6) |
| **Oregon** | 117.4 (112.7 - 122.0) |
| **Pennsylvania** | 106.6 (104.3 - 108.9) |
| **Rhode Island** | 97.3 (89.5 - 105.0) |
| **South Carolina** | 82.5 (78.9 - 86.2) |
| **South Dakota** | 135.9 (125.3 - 146.4) |
| **Tennessee** | 169.3 (164.9 - 173.8) |
| **Texas** | 117.3 (115.1 - 119.4) |
| **Utah** | 74.9 (69.5 - 80.4) |
| **Vermont** | 102.7 (92.1 - 113.3) |
| **Virginia** | 79.7 (76.8 - 82.5) |
| **Washington** | 124.9 (121.1 - 128.8) |
| **West Virginia** | 173.6 (166.0 - 181.2) |
| **Wisconsin** | 112.7 (109.0 - 116.5) |
| **Wyoming** | 119.8 (106.7 - 132.8) |
